# Supplementary material
Source: ML conference proceedings conference paper supplement (https://www.ecva.net/papers/eccv_2022/papers_ECCV/html/136680212_ECCV_2022_paper.php)
Supplement: Supplementary file 1 [file 136680212-supp.pdf]

# StyleBabel: Artistic Style Tagging and Captioning

Supplementary material

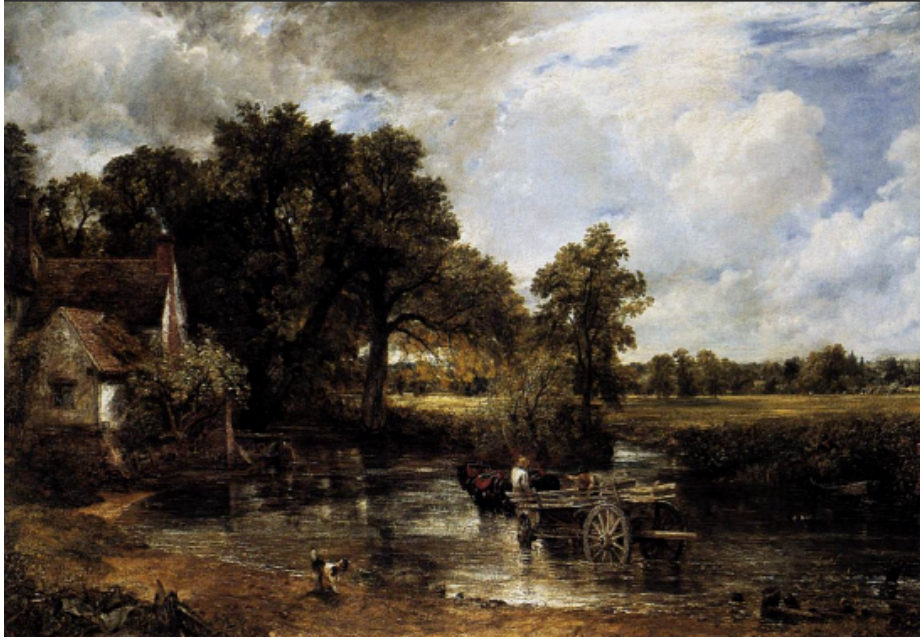

**Fig. 1.** StyleBabel generated caption focuses on style (eg ‘.. the image has dark tones and high contrast..’), rather than semantics, eg ‘..a wooded landscape with horse drawn carriage..’ from SemArt ground truth

## 1 StyleBabel Grounded Annotation: Further Information

Screen captures of the annotation tasks (Stages 1a, 1b, 2 and 3) are presented with representative data fields completed in Figures. 2-5 respectively. Please refer to the main paper for a full account of the Grounded Annotation method used to create StyleBabel .

Briefly, moodboards are annotated by in a pair-wise (contrastive) manner the initial Stage 1a (Fig. 2), where an initial tag set (vocabulary) is gathered from individual participants. Each moodboard is annotated by several participants, and the annotation passed into Stage 1b (Fig. 3), where the tags are refined as a participant group activity. Once finished, the tags are verified by the ESP-style game in Stage 2 (Fig.4), where any invalid tags are also filtered out. Descriptive sentences are gathered at this stage. Finally, to refine tag annotation to individual images, these are passed to crowd Stage 3 (Fig.5), where tags invalid for individual images are filtered out through majority consensus.



Please identify which moodboard is being described by the tags, and check its checkbox. Then, include **ALL** the given words/phrases to form descriptive captions (sentences) about the moodboard **STYLE**.  
You can click images to view them larger.


☐


☐


☐


☐


☐

If you absolutely don't agree with a word/phrase, click it to indicate. These are tags that in groups you decided were correct, so there should rarely be any that are incorrect. You can ignore duplicates.

close up shot

detailed

movement

warm tones

intricate

red tones

high saturation

close up shot

experimentation angles

bold compositions

strong composition

photography

angular shots

natural lighting

metallic elements

professional photography

energetic

commercial photography

vivid

Please use good, formal English with good grammar/punctuation.

Write moodboard caption sentences, describing the moodboard style, making use of the tags above. Write full stop separated sentences using the provided vocabulary. Aim to write at least a couple of sentences. Enter a single dash "-" if the moodboard can't be identified.

Please select here if none of the moodboards match the descriptions ☐

**Fig. 4.** Stage 2: individual evaluation task to verify the correctness of the tags, as well as generating natural language sentences from the tags.

Have a look at the art image below, and some keywords that describe its style.

Click tags which **DO NOT** match the artistic style of the image

Refer only to the **ARTISTIC STYLE** rather than the content of the image. For example, things like: **stroke/colouring type, lighting, shading, patterns, shapes, composition, medium, layout, theme, mood, etc**; NOT literal things like **cat, dog, person, etc**

Please make sure you take the time to read **ALL** the tags

**Responses are manually checked for correctness before approval, with sanity check tags / HITs randomly included.**



line

idea

scamp

sketch

original

Please select here if absolutely all the tags are 100% correct ☐

**Fig. 5.** Stage 3: crowd annotation task where non-experts are shown individual images from the moodboards along with the moodboard tags. They are asked to click which tags do not match the style of the image, to filter out any tag which apply to the moodboard generally, but not to a particular image inside it.

## 2 Data examples

TbIs. 1 and 2 show some additional samples from the StyleBabel dataset. We also include a short sample of the dataset in the companion .csv file, containing image, tags, and caption data.

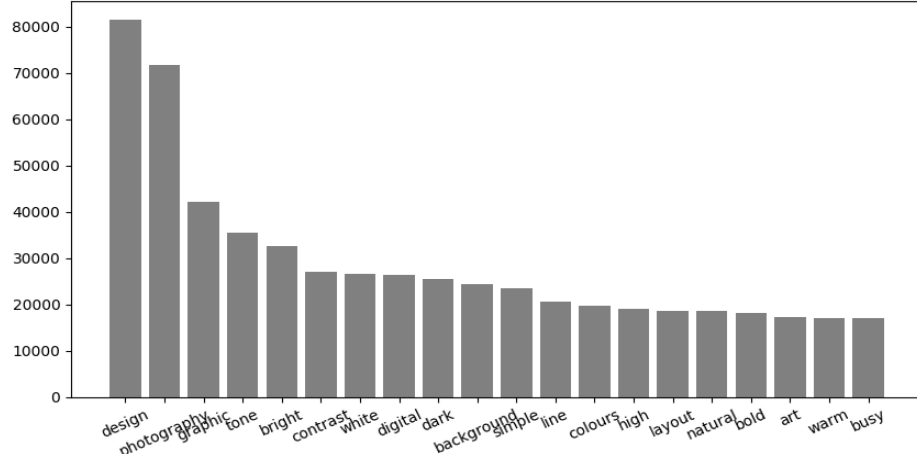

**Fig. 6.** Visualizing occurrence of the top tags in StyleBabel.

## 3 Model generated results

In Fig. 7 we show captions generated using our VirTex model trained with MS-COCO (top) and StyleBabel (bottom). We present some further examples (in Figs. 8 and 9) of tags generated using our ALADIN-ViT style embeddings and our CLIP model. Fig 11 shows word type distribution.



|         |                                                                                                                                                                                                                |                                                                                                                                                                                                                                  |                                                                                                                                                               |                                                                                                                                                                                       |                                                                                                                                                                                                                                           |
|---------|----------------------------------------------------------------------------------------------------------------------------------------------------------------------------------------------------------------|----------------------------------------------------------------------------------------------------------------------------------------------------------------------------------------------------------------------------------|---------------------------------------------------------------------------------------------------------------------------------------------------------------|---------------------------------------------------------------------------------------------------------------------------------------------------------------------------------------|-------------------------------------------------------------------------------------------------------------------------------------------------------------------------------------------------------------------------------------------|
| Image   |                                                                                                                               |                                                                                                                                                 |                                                                              |                                                                                                     |                                                                                                                                                        |
| Tags    | abstract, portrait, digital, vibrant, texture, painting, up, warm, close, illustration, colorful, bold                                                                                                         | abstract, chaotic, complex, texture, colors, pastel, sparse, scale, large, colorful, expressionism                                                                                                                               | dated, random, promotional, advertising, poster, typography, ux, graphic                                                                                      | line, fantasy, cartoon, bold, black, sketchbook, drawing, story, white, fan, monotone, mystical, art, character, illustration                                                         | old, traditional, worn, western, digital, paper, advertisement, stained, cow-boy, warm, child, poster, typography, wild, character, graphic                                                                                               |
| Caption | Portrait illustration featuring vibrant colors against a plain background. The digitally rendered painting gives a bold feeling.                                                                               | Abstract oil painting with textures and splashes is composed of paintbrush strokes. The expressionism artwork is complex and chaotic.                                                                                            | Digital poster illustration featuring bold typography and vector images. The graphic designs in vibrant colors give a dated feel to the promotional material. | Sketch art of line drawing featuring decorative patterns and curved lines against a plain background. The illustration use thin linear and repetitive patterns.                       | Digital advertisement poster layout using retro style with linear line art graphics against a stained background with border. The content consists of digital graphic designs with cluttered informative typography using stylized fonts. |
| Image   |                                                                                                                             |                                                                                                                                               |                                                                            |                                                                                                   |                                                                                                                                                      |
| Tags    | complementary, pattern, bright, crowded, rounded, fluid, motif, doodle, monochrome, sporadic, repetitive, graphic                                                                                              | abandoned, dark, derelict, dull, ghostly, spooky                                                                                                                                                                                 | logo, identity, clean, outline, thick, animal, black, visual, branding, white, iconography, type, monochrome, vector, icon, typography                        | 360, industrial, photography, aerial, natural, conceptual, architectural, drone, render, dull, landscape                                                                              | abstract, chaotic, complex, texture, colors, pastel, sparse, scale, large, colorful, expressionism                                                                                                                                        |
| Caption | Layout design featuring a graphical design with a crowded and repetitive style. The design contains small motifs and doodles in different shapes with a vibrant and bright style against the white background. | Wide-angle photograph using natural warm lighting and shadow effect of an abandoned architectural structure with cylindrical shapes and grids. The dramatic photograph captures the golden hue and foamy wave pattern in nature. | Digital typographic logo design using graphic elements and stylized font against a dark background. The color scheme is contrasting.                          | 3d rendered mockup of architectural design from an aerial shot. The conceptual layout shows industrial structures with symmetrical shapes and designs against a landscape background. | Abstract oil painting featuring chaotic and complex textures and colors. This expressionism also features sparse textures using pastel and muted colors.                                                                                  |

**Table 1.** Excerpt of StyleBabel dataset. Images and the corresponding tags and sentences collected via our Grounded Annotation.

|         |                                                                                                                                                                                                   |                                                                                                                                                                                                            |                                                                                                                                                                                                                           |                                                                                                                                                                                                         |                                                                                                                                                                                                                                        |
|---------|---------------------------------------------------------------------------------------------------------------------------------------------------------------------------------------------------|------------------------------------------------------------------------------------------------------------------------------------------------------------------------------------------------------------|---------------------------------------------------------------------------------------------------------------------------------------------------------------------------------------------------------------------------|---------------------------------------------------------------------------------------------------------------------------------------------------------------------------------------------------------|----------------------------------------------------------------------------------------------------------------------------------------------------------------------------------------------------------------------------------------|
| Image   |                                                                                                                  |                                                                                                                           |                                                                                                                                          |                                                                                                                       |                                                                                                                                                     |
| Tags    | business, logotype, identity, personal, serif, mock-up, simple, sleek, visual, branding, minimal, sans, promotional, professional, monochrome, formal, font, card                                 | creative, graphic, paper, animated, flat, development, sketch, drawing, artistic, amateur, professional, illustration, character, storyboard                                                               | creative, graphic, paper, flat, animated, development, sketch, drawing, artistic, amateur, professional, illustration, character, storyboard                                                                              | mock-up, black, simple, branding, white, classy, stylish, book                                                                                                                                          | contrast, kaleidoscope, psychedelic, complex, intricate, complicated, paisley, colored, colorful, repetitive, surreal                                                                                                                  |
| Caption | Mock-up of formal business cards with simple and sleek typography using serif font. This visual identity layout also features a logo design with green outlining displayed on a plain background. | Sketch illustration featuring creative graphic design. Flat animated drawing is detailed with artistic lines for character development.                                                                    | Raw digital sketch representing an artistic storyboard on development stage with structured character design and animated setup formation. The creative drawing has an amateur approach with flat visual presentation.    | 3D rendered book mock-up for publication. The simple monochromatic cover page looks classy, featuring graphic design, cropped photograph of a female and minimal typography against a black background. | kaleidoscopic illustration featuring repetitive psychedelic pattern with abstract shapes against a plain background. The colorful artwork is complex and intricate.                                                                    |
| Image   |                                                                                                                 |                                                                                                                          |                                                                                                                                         |                                                                                                                      |                                                                                                                                                    |
| Tags    | industrial, clean, structured, bright, architectural, masculine, modern, futuristic, linear, monotone, mechanical                                                                                 | fine, texture, pattern, colors, detailed, geometric, secondary, repetitive                                                                                                                                 | interior, concept, retail, model, architectural, mock-up, prototype, commercial, 3d, render, floorplan, magazine, generation, section, editorial                                                                          | abstract, paint, watercolor, psychedelic, fine, texture, pattern, oil, colors, floral, crowded, warm, vivid, art, overwhelming, colorful, repetitive                                                    | dark, contrast, digital, vibrant, bright, colors, dynamic, manipulation, neon, fan, illustration, art, object                                                                                                                          |
| Caption | Photography of a luxurious interior design with structured grids and artificial light. The formation of the multifunctional industrial space is symmetrically aligned and looks clean.            | Illustration featuring repetitive patterns and fine textures against a plain background. The detailed artwork is composed of geometric shapes and secondary tones which creates an illusory visual effect. | Digital layout, presenting a centered conceptual 3D architectural interior floor-planning design developed in linear, and textured patterns in warm neutral tones. The prototype is displayed against a plain background. | Abstract watercolor painting featuring repetitive psychedelic patterns and floral design. The artwork is overwhelming with the composition of fine textures and shades.                                 | Digitally manipulated illustration featuring a futuristic theme, a photograph with perspective distortion, geometric shapes and ripple patterns. The dynamic image is eye catching with vibrant neon colors against a dark background. |

**Table 2.** Excerpt of StyleLabel dataset. Images and the corresponding tags and sentences collected via our Grounded Annotation.

|            |                                                                                       |                                                                                           |                                                                                               |                                                                                                |                                                                                         |
|------------|---------------------------------------------------------------------------------------|-------------------------------------------------------------------------------------------|-----------------------------------------------------------------------------------------------|------------------------------------------------------------------------------------------------|-----------------------------------------------------------------------------------------|
|            |      |          |              |              |      |
| MS-COCO    | a close up of a bird in a tree                                                        | a bunch of flowers are in a vase                                                          | a bottle of beer sit-ting on top of a red with                                                | a colorful building painted on it                                                              | a picture of a pic-ture of a picture of a wall                                          |
| StyleBabel | the pencil sketch is digital illustration                                             | digital illustration                                                                      | digital illustration                                                                          | abstract painting                                                                              | digital illustration                                                                    |
| CL+IL      | a soft linear draw-ing with the use of shades and strokes against a plain back-ground | of a fictional char-acter using a dark color palette                                      | featuring repetitive shapes and patterns using a color palette of blue and red                | with geometric shapes and patterns using bright colors                                         | of a fictional char-acter using a color palette of black and white                      |
|            |      |          |             |              |      |
| MS-COCO    | a group of birds are in the sky                                                       | a display of a display with many clocks                                                   | a group of birds that are on a pole                                                           | a close up of a pic-ture of the water                                                          | a close up of a per-son with a black background                                         |
| StyleBabel | digital layout of a logo with minimal typography and a white background               | digital illustration of cartoon characters using bright colors against a white background | digital illustration of a sketch with line drawings on a white background                     | abstract using brush strokes and scribbles using a cool color palette                          | oil paint-digital illustration of repetitive linear pattern using blue and white colors |
|            |    |        |            |            |    |
| MS-COCO    | a picture of a wall of a wall with a wall                                             | a close up of a woman with a hair                                                         | a colorful deco-rated decorated jacket is standing in a decorated with col-ourful decorations | a man in a red front of a store                                                                | a white and white white and white building                                              |
| StyleBabel | digital illustration of the sketch is a soft digital illustration                     | linear drawing with the use of shades and strokes against a white background              | of an animated character using bright colors                                                  | event photography featuring subject in center with colorful lighting against a blue background | 3d rendered mod-ern interior design with repetitive shapes                              |
| CL+IL      | a 3d rendered illus-tration with repeti-tive shapes and pat-terns                     | linear drawing with the use of shades and strokes against a white background              | of an animated character using bright colors                                                  | event photography featuring subject in center with colorful lighting against a blue background | 3d rendered mod-ern interior design with repetitive shapes                              |

**Fig. 7.** Examples of natural language sentences generated for various art styles; The top row shows captions generated using a VirTex model trained on MS-COCO, and the bottom row shows captions generated using VirTex trained on StyleBabel.

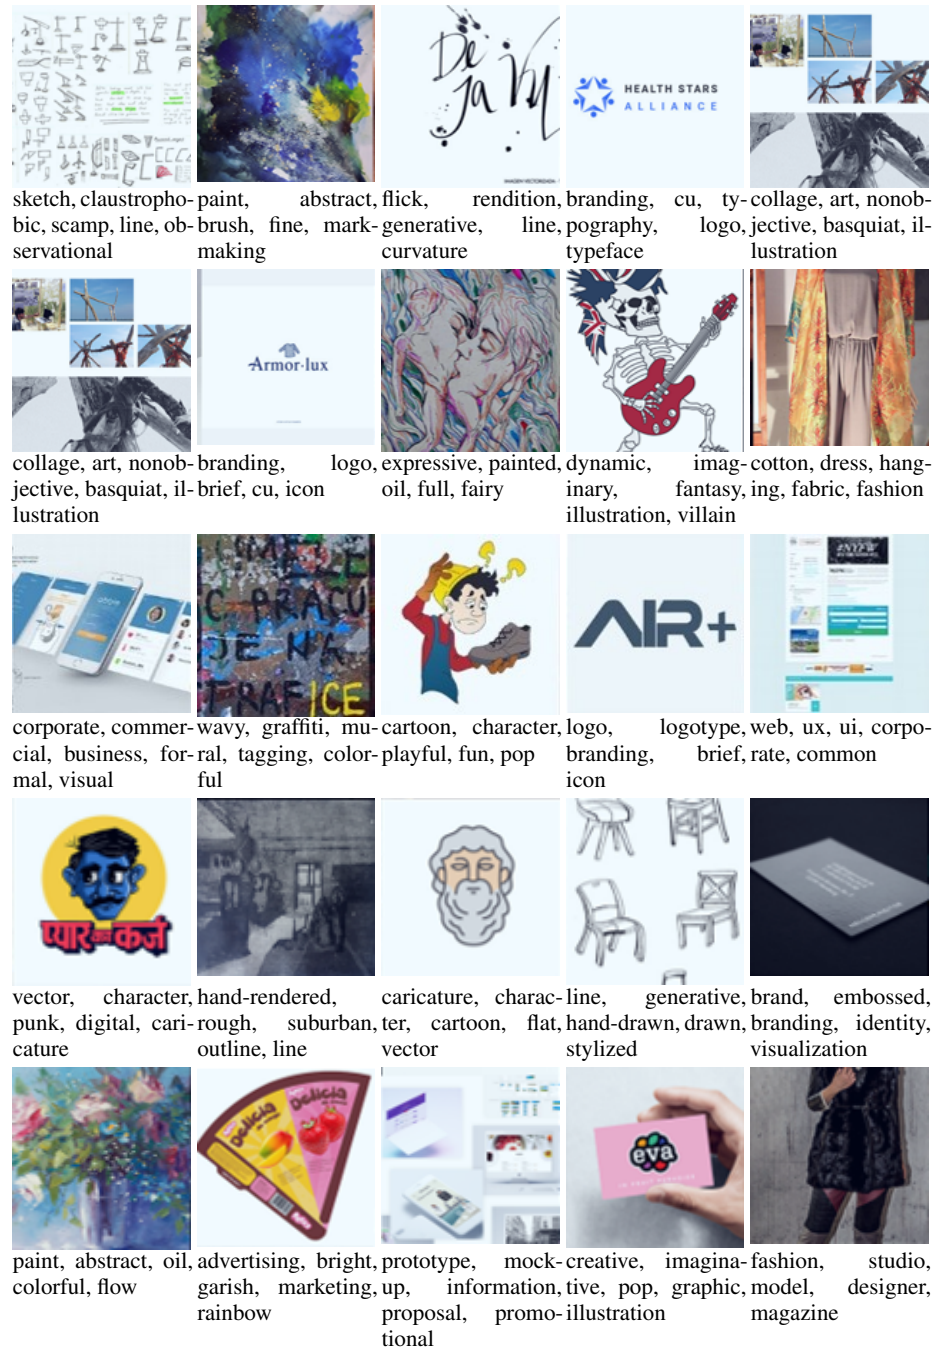

**Fig. 8.** Style2Text tag generation experiment, using CLIP trained with ALADIN-ViT encoder. Top 5 tags shown for each image.



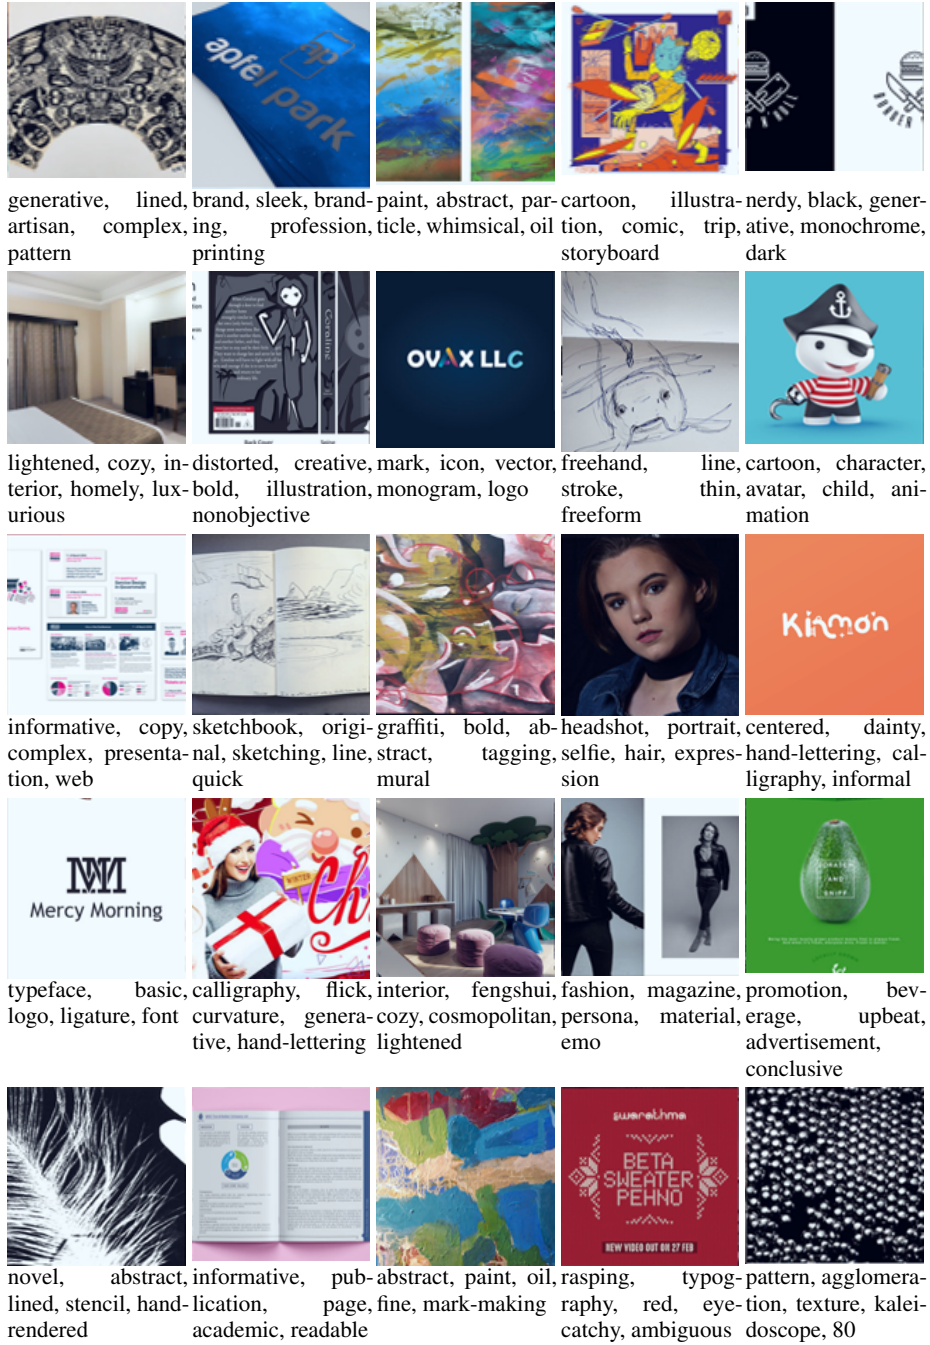

**Fig. 9.** Style2Text tag generation experiment, using CLIP trained with ALADIN-ViT encoder. Top 5 tags shown for each image.

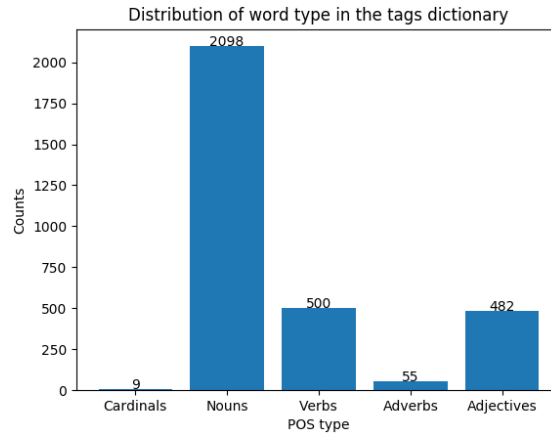

**Fig. 10.** Distribution of word types for the set of unique style attributes (tags) collected for images within the StyleBabel dataset

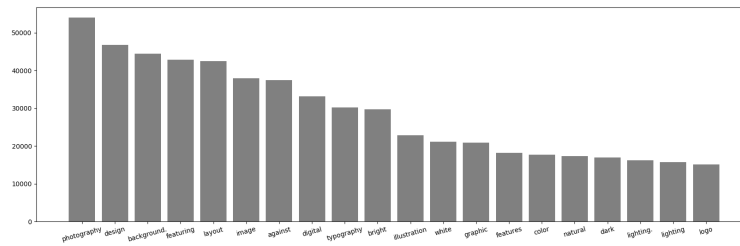

**Fig. 11.** Occurences of the top words in the StyleBabel captions
